# Supplementary material
Source: Springer Nature journal article supplement (https://www.springermedizin.de/resource/supplementary/12911_2006_157_MOESM3_ESM.pdf/9527266)

Literature  
Review

Web Search

Pre-development  
Survey

Gap Analysis

Beta  
Development

Beta Testing

Evaluation &  
Sustainability

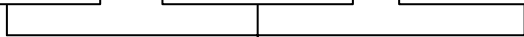

Supplement: MOESM3 [file 9527266]
